# Supplementary material for: Observation selection bias in contact prediction and its implications for structural bioinformatics
Source: PubMed Central journal article supplement (PMC5114557; doi:10.1038/srep36679), 2016-11-18
Supplement: srep36679-s1.pdf [file srep36679-s1.pdf]

# Observation selection bias in contact prediction and its implications for structural bioinformatics

G. Orlando<sup>1,2,3,†</sup>, D. Raimondi<sup>1,2,3,†</sup>, W.F. Vranken<sup>1,2,3,\*</sup>

1 Interuniversity Institute of Bioinformatics in Brussels, ULB-VUB, La Plaine Campus, Triomflaan

2 Structural Biology Brussels, Vrije Universiteit Brussel, Pleinlaan 2

3 Structural Biology Research Center, VIB,1050 Brussels, Belgium

† Contributed equally

---

\*Corresponding Author: [wvranken@vub.ac.be](mailto:wvranken@vub.ac.be)

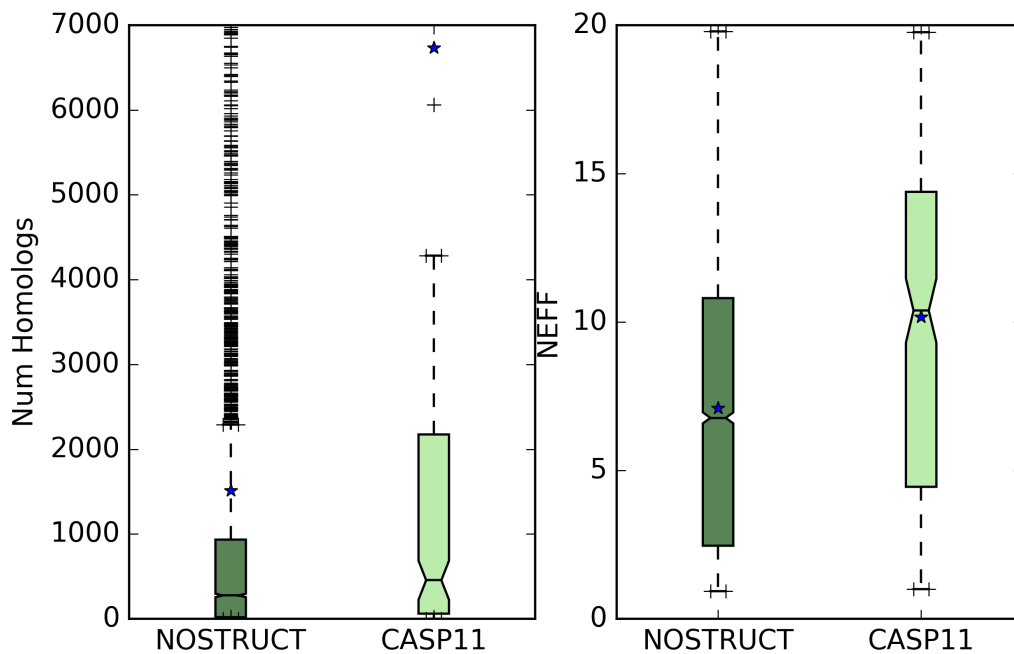

**Figure 1:** Boxplots showing the difference in the number of homologs and NEFF between the NOSTRUCT and CASP11 datasets.

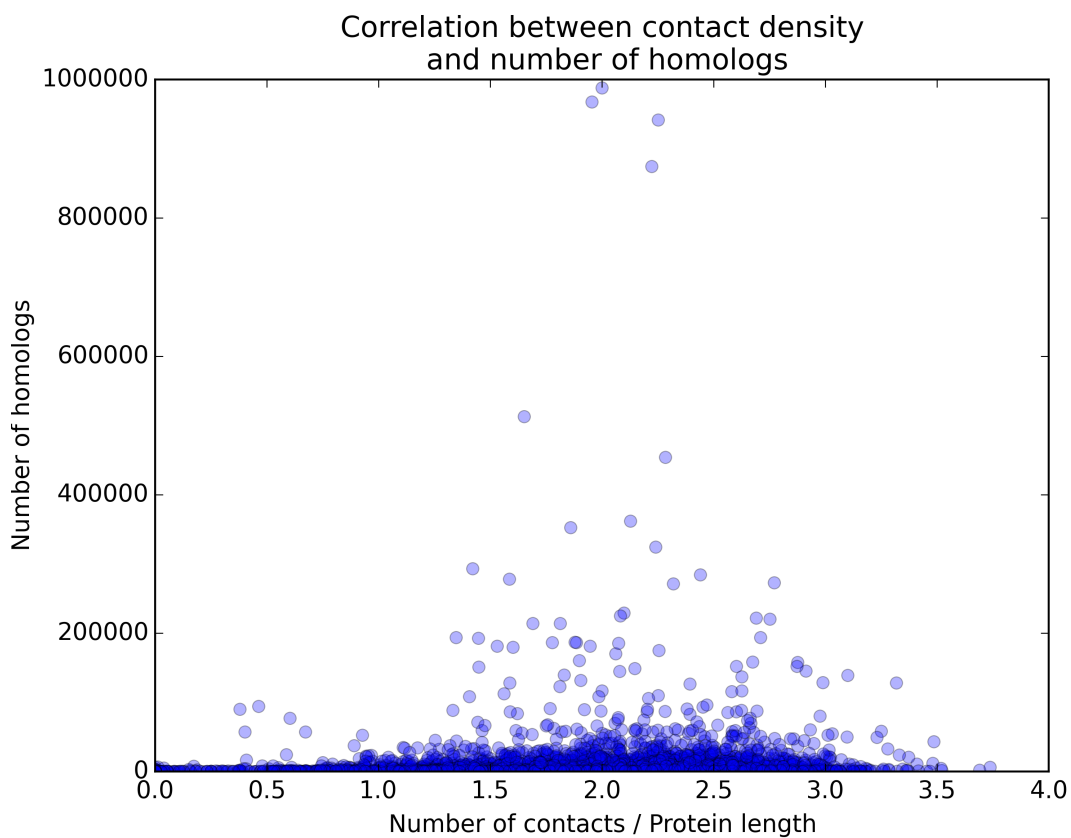

**Figure 2:** Scatter plot showing the correlation between the contact density within each protein chain and the number of available homologs. Pearson correlation is  $r = 0.06$ .

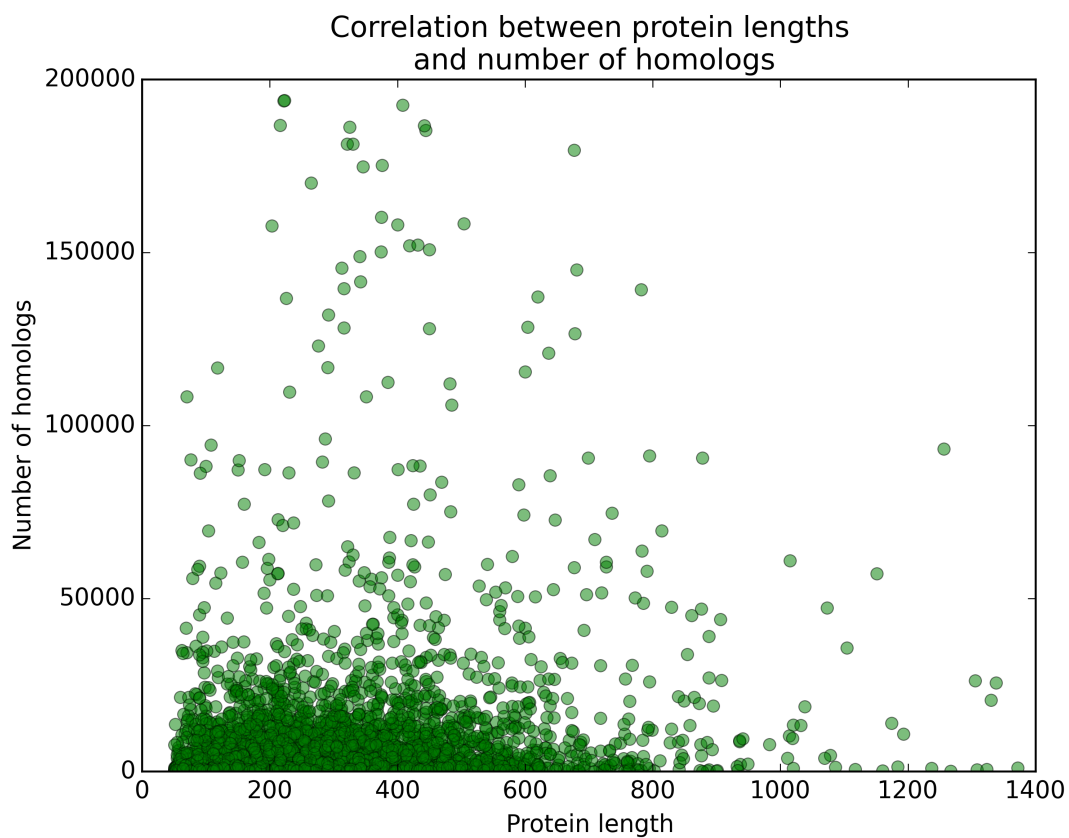

**Figure 3:** Scatter plot showing the correlation between the number of retrieved homologs and the length of the protein. Pearson correlation is  $r = 0.16$ .

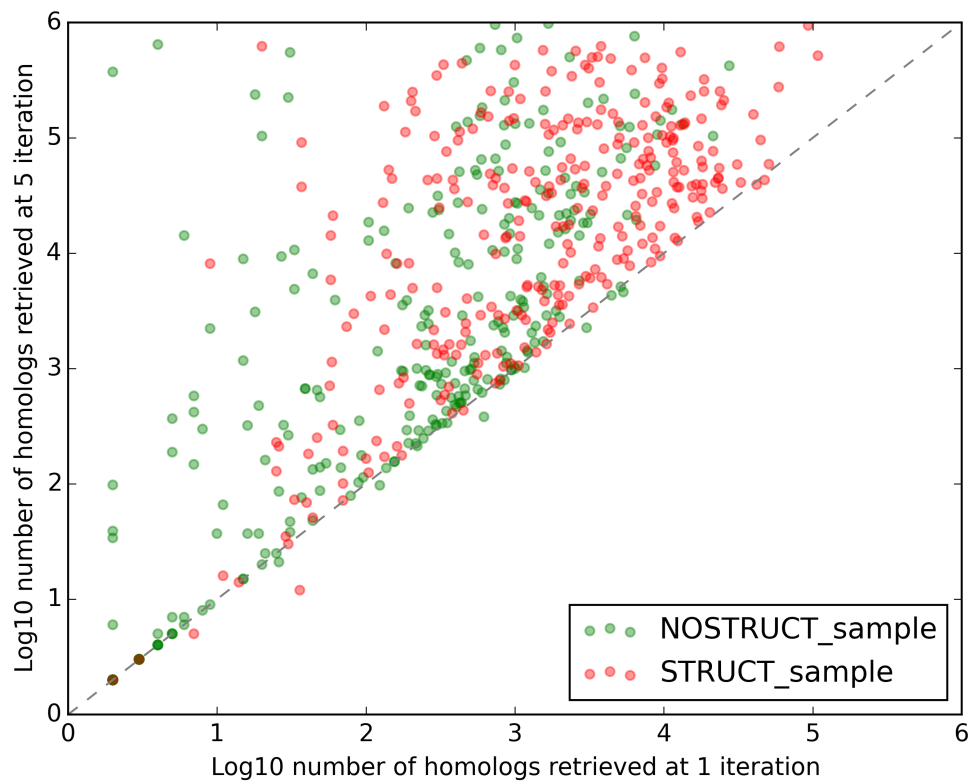

**Figure 4:** Relationship between the number of homologs retrieved with a single iteration of JackHMMer and the ones retrieved with 5 iterations. From this plot it is possible to see that in the nearly all the cases increasing the number of iterations leads to more retrieved homologs.

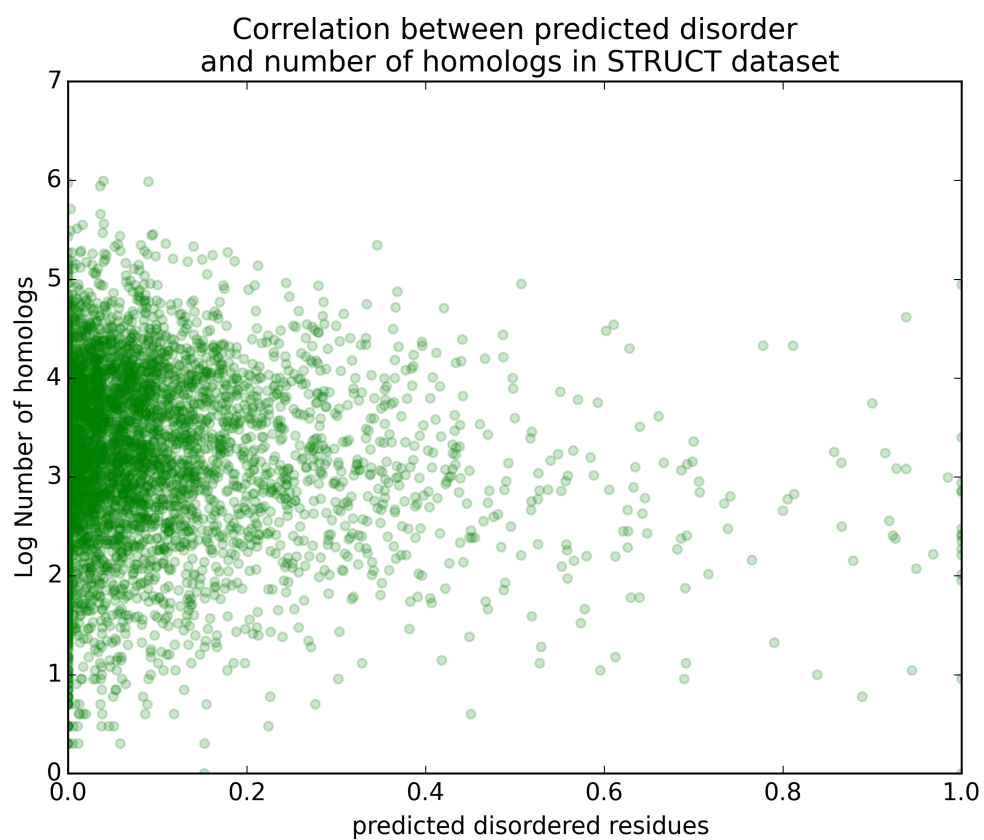

**Figure 5:** Scatter plot showing the correlation between the fraction of disordered residues within each protein chain of the STRUCT dataset as predicted by IUPRED. Pearson correlation is  $r = -0.035$ .

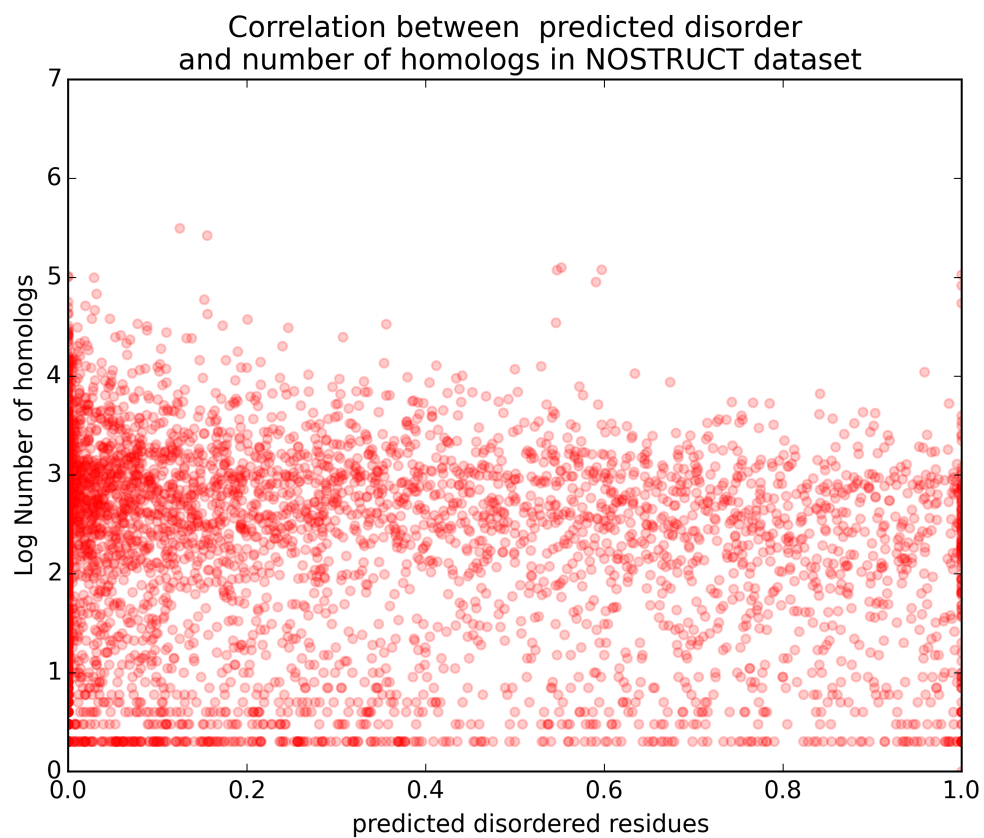

**Figure 6:** Scatter plot showing the correlation between the fraction of disordered residues within each protein chain of the NOSTRUCT dataset as predicted by IUPRED. Pearson correlation is  $r = -0.06$ .

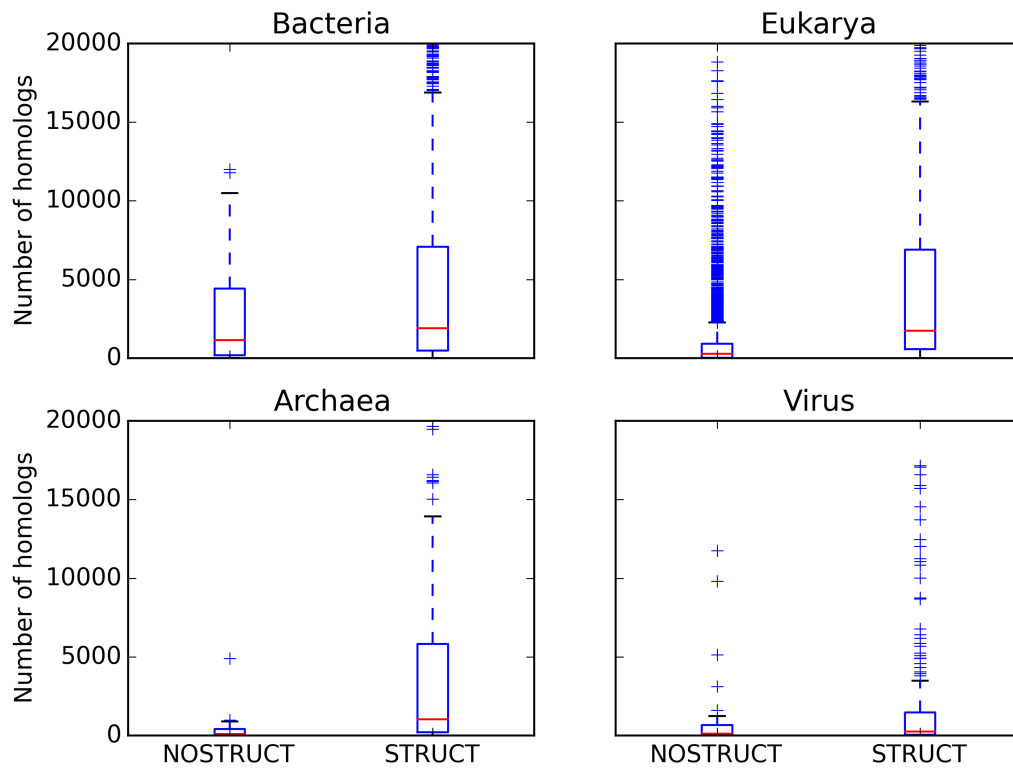

**Figure 7:** Boxplots showing the number of homologs retrieved for the STRUCT and NOSTRUCT datasets stratified by organism using the taxonomic domain, the highest taxonomic rank.



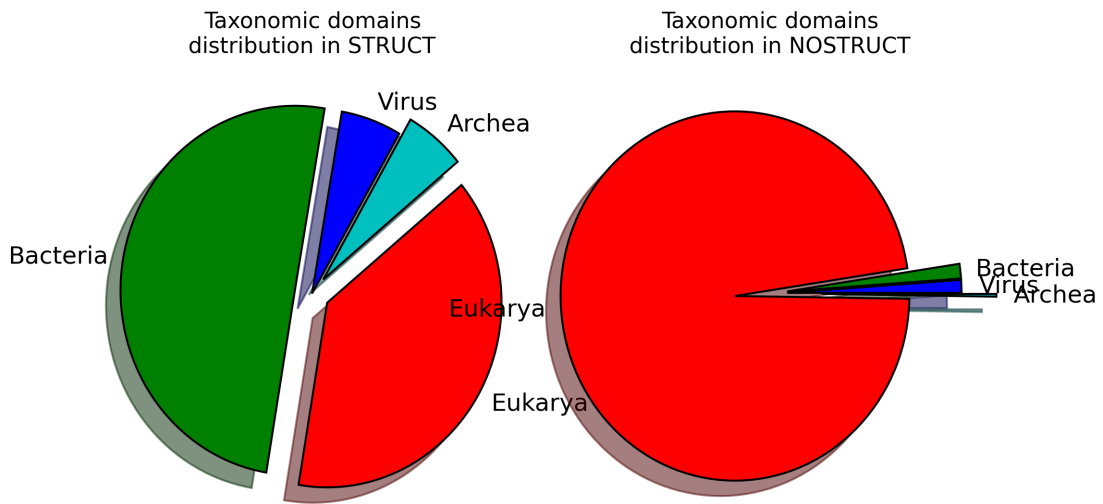

**Figure 8:** Pie charts showing the organism composition, in terms of taxonomic domain, of the STRUCT and NOSTRUCT datasets. Half of the proteins in STRUCT are from Bacteria and 38% are from Eukarya. These percentages are very different in NOSTRUCT, which is highly enriched in Eukarya (97%). These pie charts are representative of the organism distributions observed in PDB and SwissProt respectively.

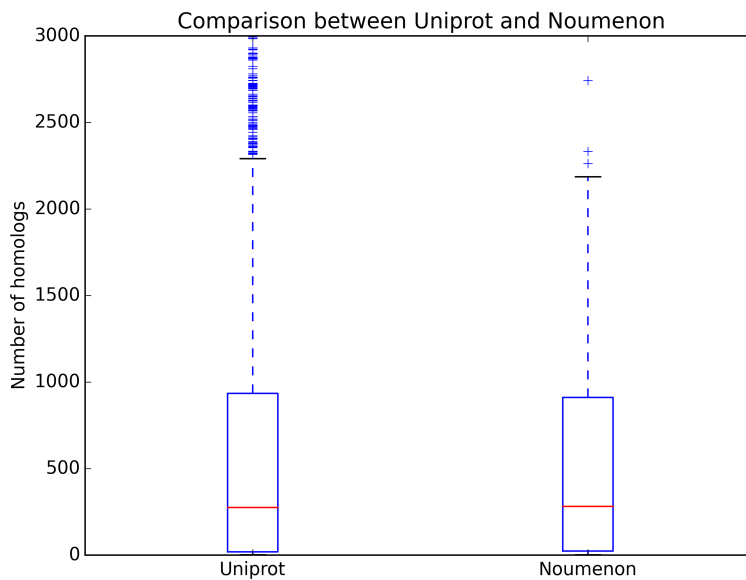

**Figure 9:** Distributions of available homologs for the NOSTRUCT and NOUMENON datasets. The two tailed Wilcoxon ranksum  $p$ -value is 0.56 and thus the null hypothesis that the two sets of measurements are drawn from the same distribution can not be rejected.

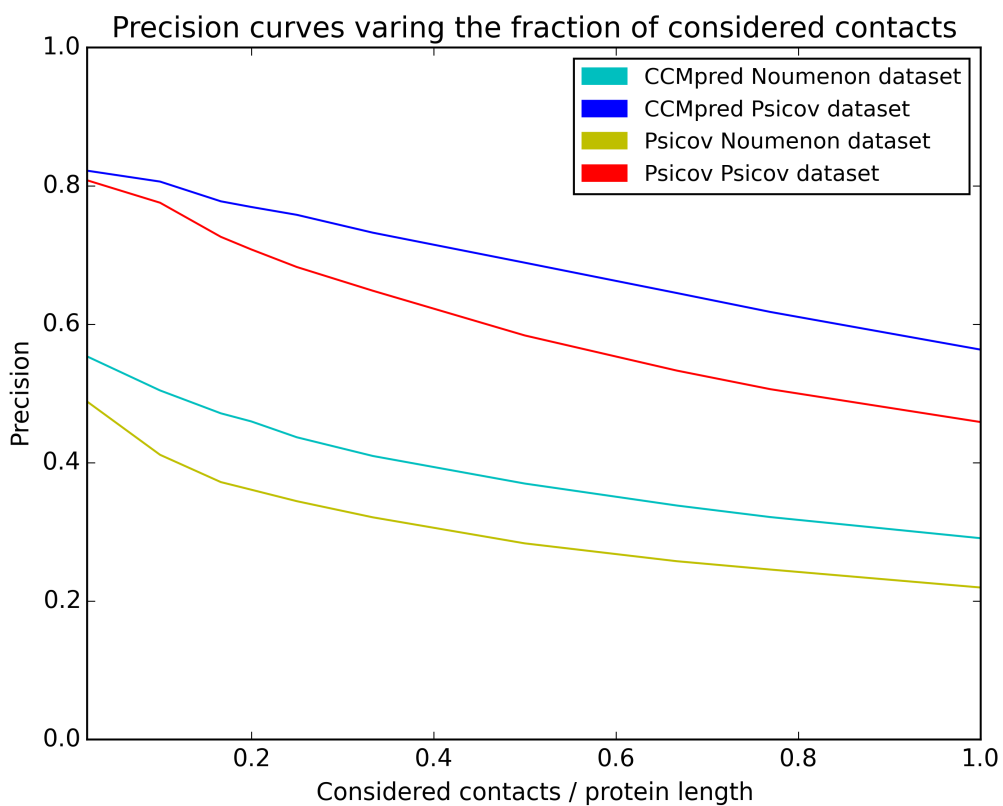

**Figure 10:** Precision curves for the PSICOV and CCMpred predictors obtained on the PSICOV and NOUMENON datasets by varying the fraction of contacts considered with respect to the protein length  $L$ .

| Iter | NOUMENON best L PPV |         | PSICOV best L PPV |         |
|------|---------------------|---------|-------------------|---------|
|      | PSICOV              | CCMpred | PSICOV            | CCMpred |
| 1    | 0.13                | 0.18    | 0.34              | 0.44    |
| 2    | 0.19                | 0.26    | 0.44              | 0.54    |
| 3    | 0.22                | 0.29    | 0.46              | 0.59    |

**Table 1:** Precision (PPV) scores for the best L predictions on the NOUMENON and PSICOV datasets, computed with PSICOV and CCMpred methods, by varying the number of iterations of Jackhammer MSAs (E-value=0.0001).
